# Supplementary figures and images for: GPX2 is a potential therapeutic target to induce cell apoptosis in lenvatinib against hepatocellular carcinoma
Source: PubMed Central journal article supplement — J Adv Res. 2022 Mar 21;44:173–83. doi: 10.1016/j.jare.2022.03.012 (PMC9936410; doi:10.1016/j.jare.2022.03.012), 2022-03-21

**Fig. 2D**

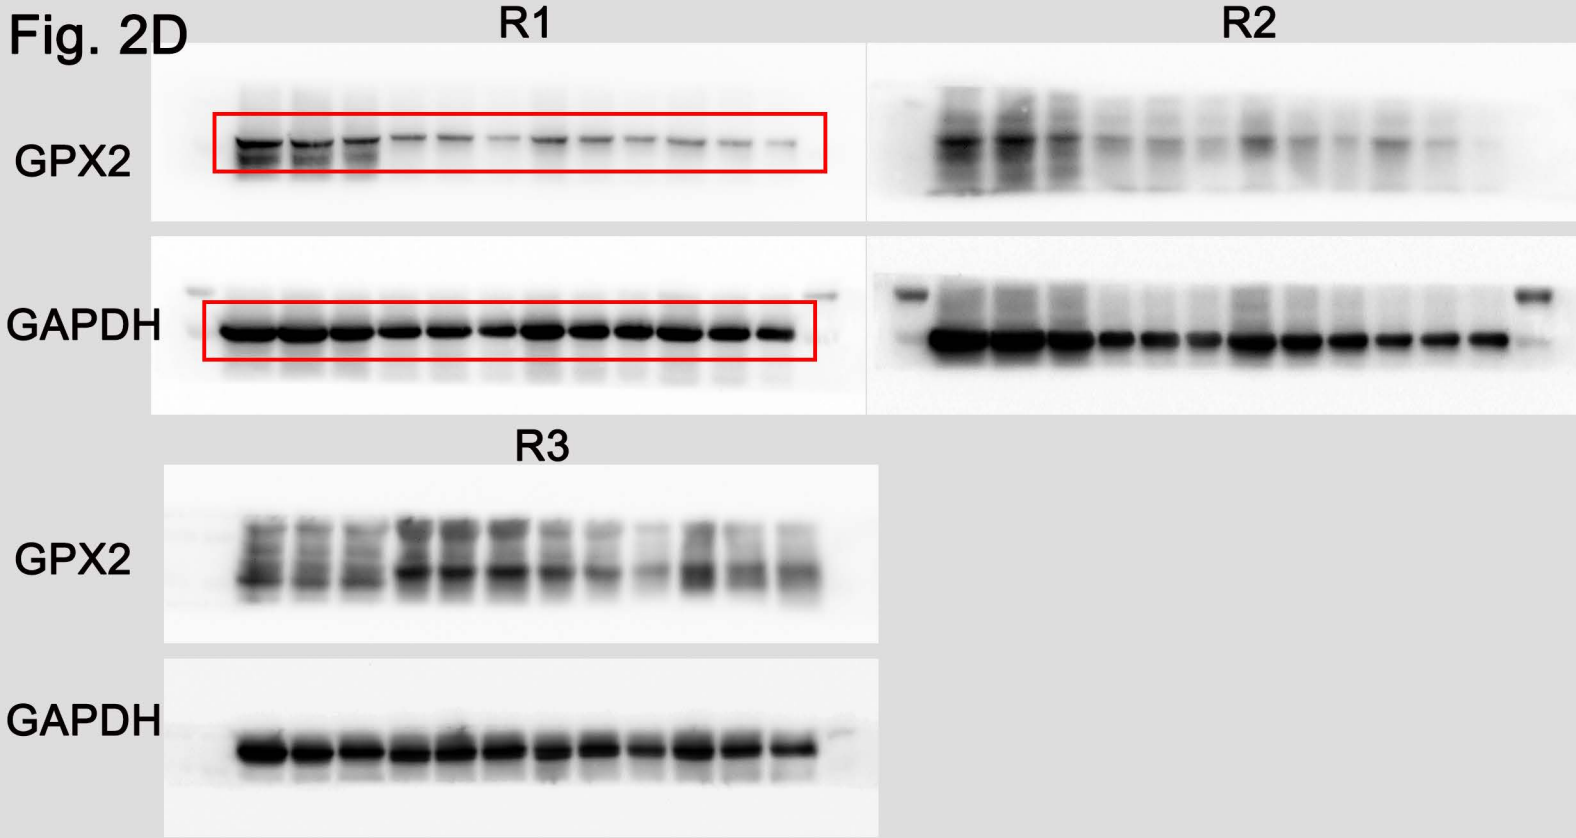

**Fig. 3E**

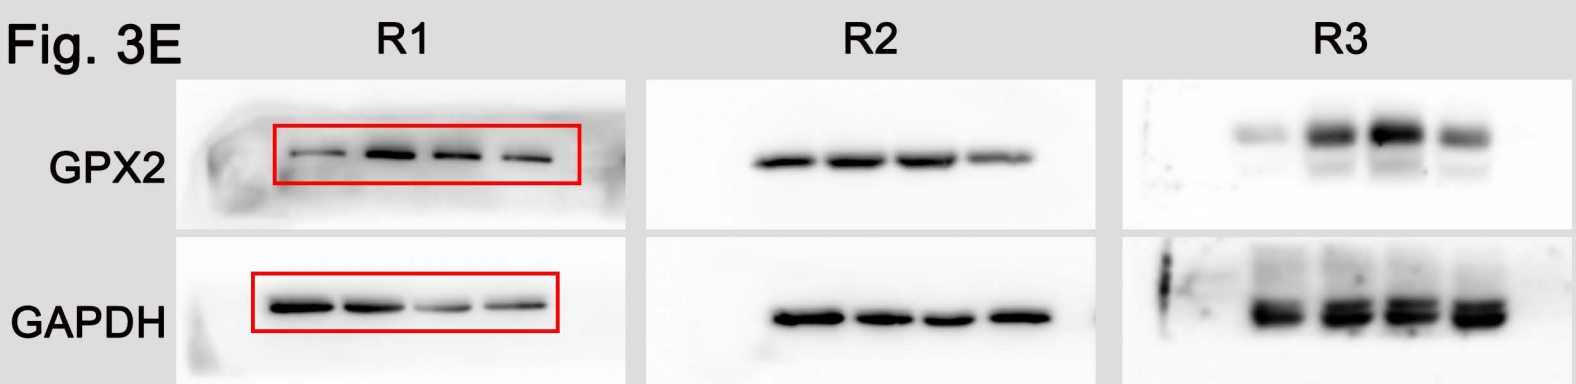

**Fig. 4E**

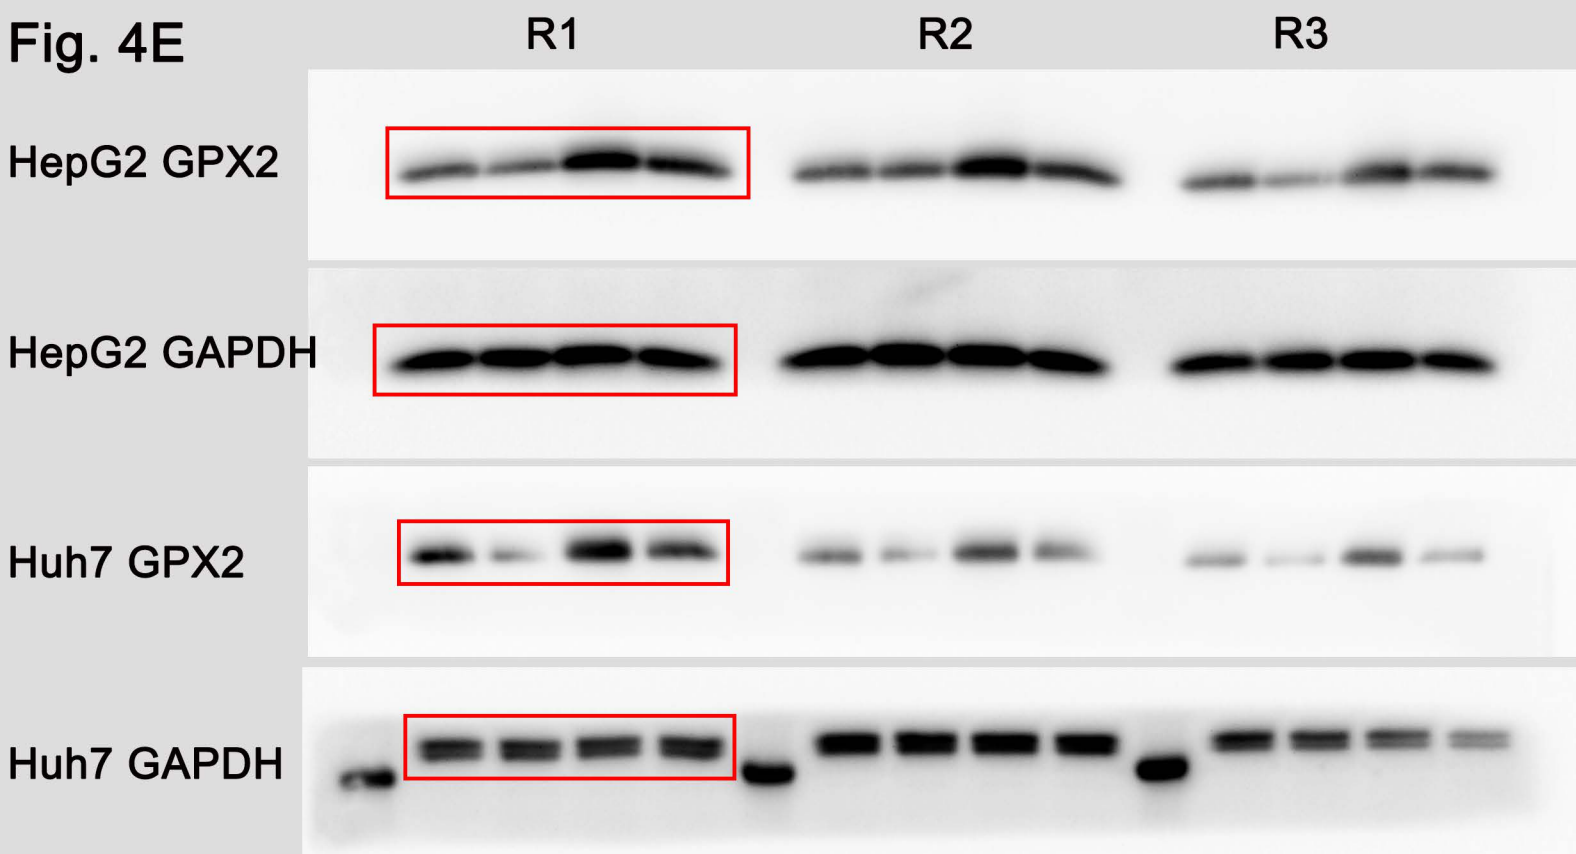

Fig.4F

R1

$\beta$ -catenin

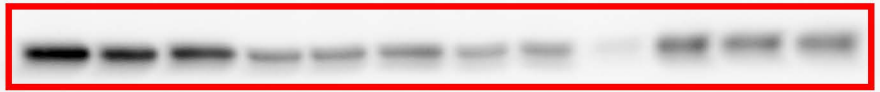

GAPDH

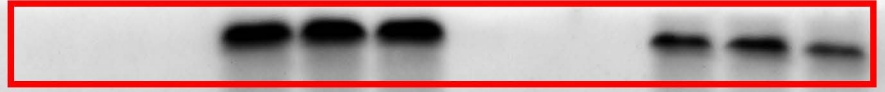

H3

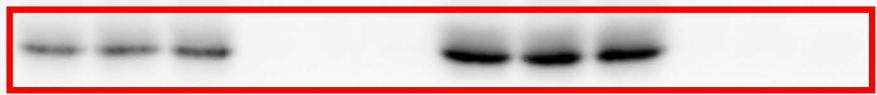

R2

$\beta$ -catenin

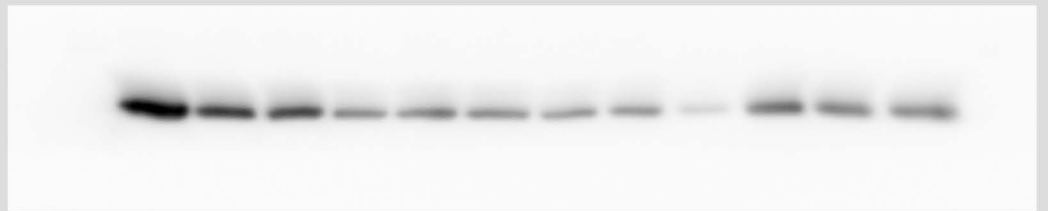

GAPDH

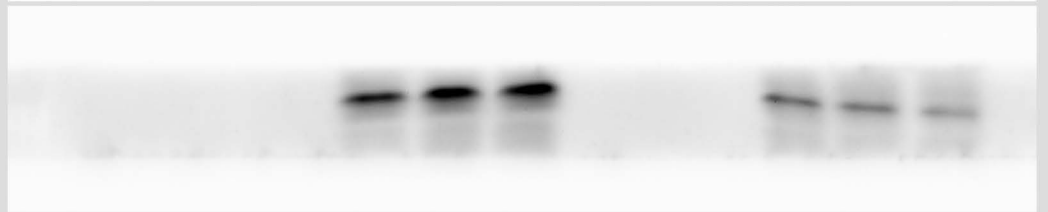

H3

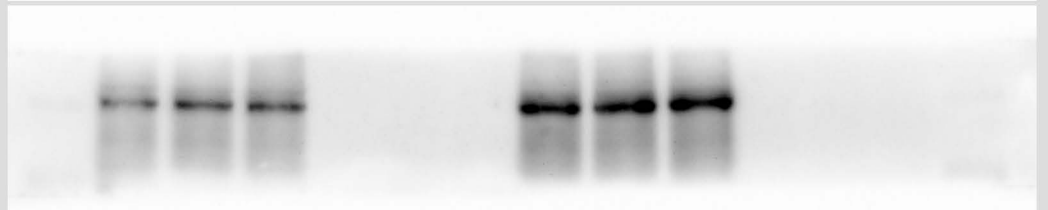

R3

$\beta$ -catenin

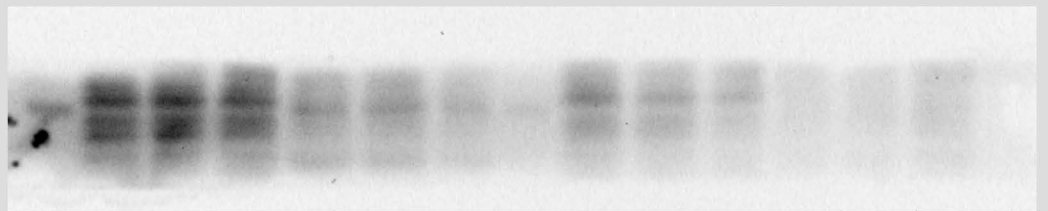

GAPDH

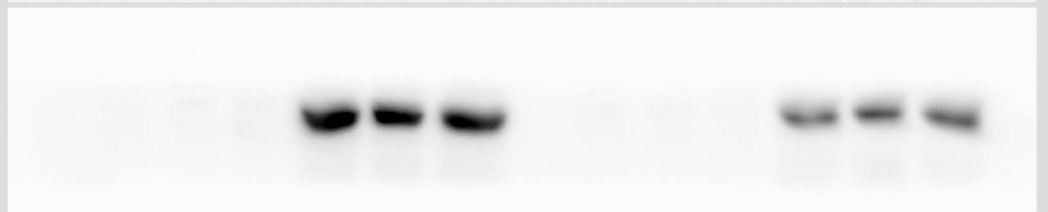

H3

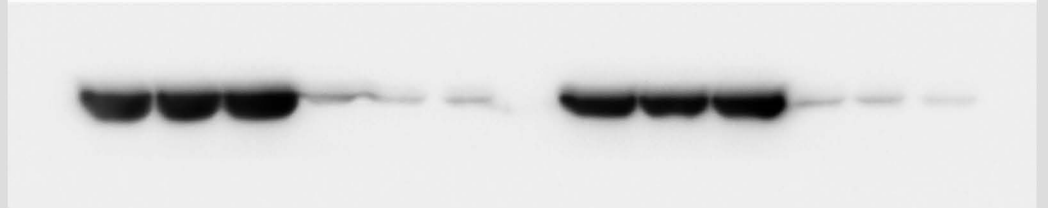

Supplement: mmc2.pdf [file mmc2.pdf]
